## Hemodynamic Responses to Crystalloid and Colloid Fluid Boluses during Noncardiac Surgery: Erratum

In the online first article that published on November 1, 2021, the unit of measure in figure 1 was mislabeled as “mmHg.” The correct label is  $\text{L} \cdot \text{min}^{-1} \cdot \text{m}^{-2}$ . The corrected figure and legend appear below.

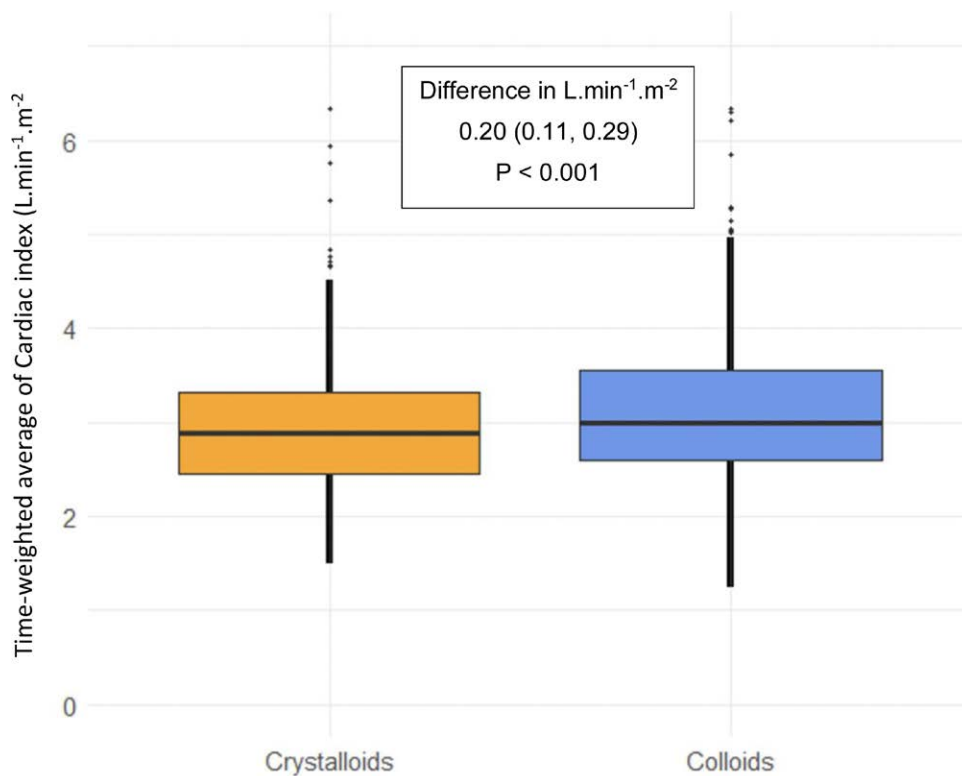

**Fig. 1.** Time-weighted average of cardiac index plotted by choice of fluids. The time-weighted average of the cardiac index was compared between fluid groups using a linear model with adjustments for smoking status and preoperative hemoglobin. Using  $N = 973$  measurements, a significant difference in means was detected.

The authors regret this error. The online version and PDF of the article have been corrected.

DOI: 10.1097/ALN.0000000000004091

### Reference

Reiterer C, Kabon B, Halvorson S, Sessler DI, Mascha EJ, Kurz A, Crystalloid-Colloid Research Group: Hemodynamic responses to crystalloid and colloid fluid boluses during noncardiac surgery. *ANESTHESIOLOGY* 2022; 136:127–37
